# Supplementary material
Source: PubMed Central journal article supplement (PMC6085878)
Supplement: NIHMS1501246-supplement-2.pdf [file NIHMS1501246-supplement-2.pdf]

Supplementary Table 1

| <b>Oligos used for qRT-PCR</b> |                             |
|--------------------------------|-----------------------------|
| <b>Oligo</b>                   | <b>Sequence (5'-3')</b>     |
| WWTR1 FW                       | GGCTGGGAGATGACCTTCAC        |
| WWTR1 REV                      | CTGAGTGGGGTGGTTCTGCT        |
| IL4R FW                        | CGTCTCCGACTACATGAGCATCT     |
| IL4R REV                       | CCACAGGTCCAGTGTATAGTTATCC   |
| GAPDH FW                       | ATGGGGAAGGTGAAGGTCG         |
| GAPDH REV                      | GGGGTCATTGATGGCAACAATA      |
| CTGF FW                        | GCAGAGCCGCCTGTGCATGG        |
| CTGF REV                       | GGTATGTCTTCATGCTGG          |
| CYR61 FW                       | ATTGTAGAAAGGAAGCCTTGCTCAT   |
| CYR61 REV                      | TCCAATCGTGGCTGCATTAG        |
| SOX2 FW                        | TAC AGC ATG TCC TAC TCG CAG |
| SOX2 REV                       | GAGGAAGAGGTAACCACAGGG       |
| OCT4 FW                        | GGGCTCTCCCATGCATTCAAAC      |
| OCT4 REV                       | CACCTTCCCTCCAACCAGTTGC      |
| NANOG FW                       | AGTCCCAAAGGCAAACAACCCACTTC  |
| NANOG REV                      | TGCTGGAGGCTGAGGTATTTCTGTCTC |
| MYOD FW                        | GGTCCCTCGCGCCCAAAGAT        |
| MYOD REV                       | CAGTTCTCCCGCCTCTCCTAC       |
| MYOGENIN FW                    | CAGTGCACTGGAGTTCAGCG        |
| MYOGENIN REV                   | TTCATCTGGGAAGGCCACAGA       |
| MYF6 FW                        | CCCCTCAGCTACAGACCCAA        |
| MYF6 REV                       | CCCCTGGAATGATCGGAAAC        |
| YAP1 FW                        | CCTTCTCAAGCCGCGGAG          |
| YAP1 REV                       | CAGTGTCCTCAGGAGAAACAGC      |
